# Supplementary figures and images for: Oral treprostinil in transition or as add-on therapy in pediatric pulmonary arterial hypertension
Source: PubMed Central journal article supplement — Pulm Circ. 2019 Jul 12;9(3):2045894019856471. doi: 10.1177/2045894019856471 (PMC6628532; doi:10.1177/2045894019856471), 2019-07-12

Cohort 1

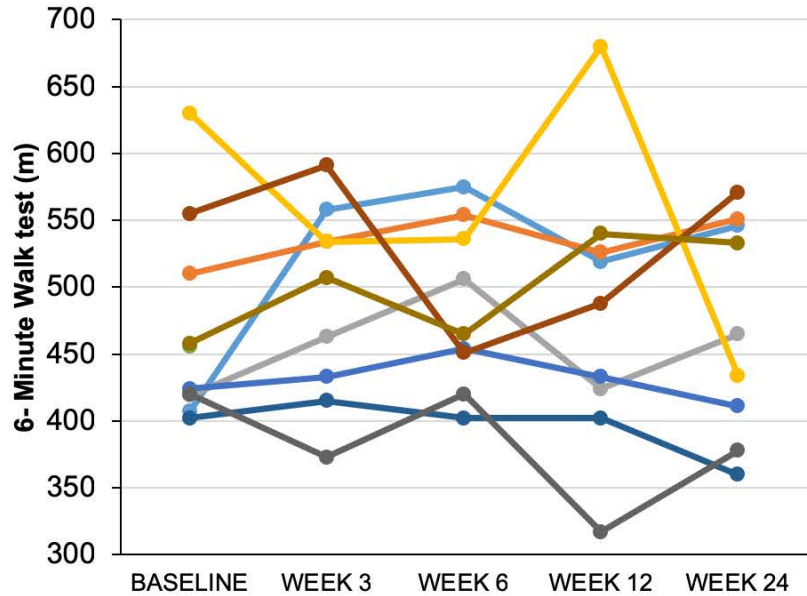

Cohort 2

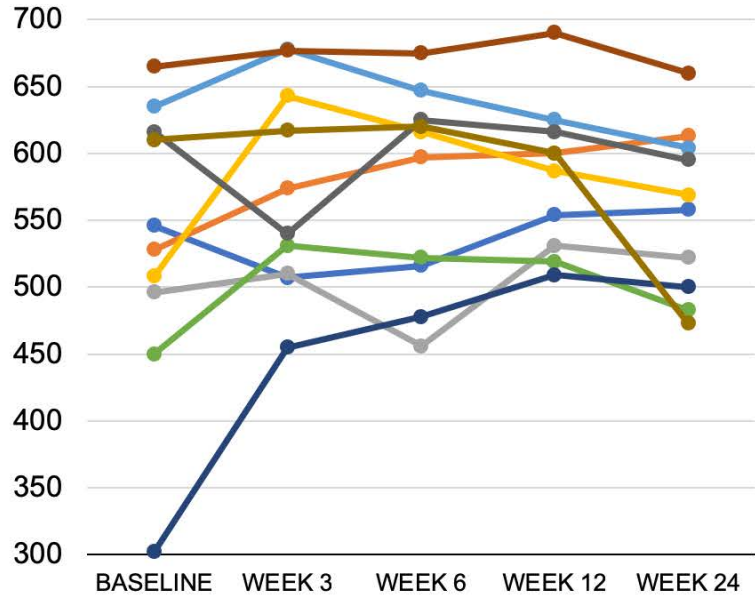

Cohort 3

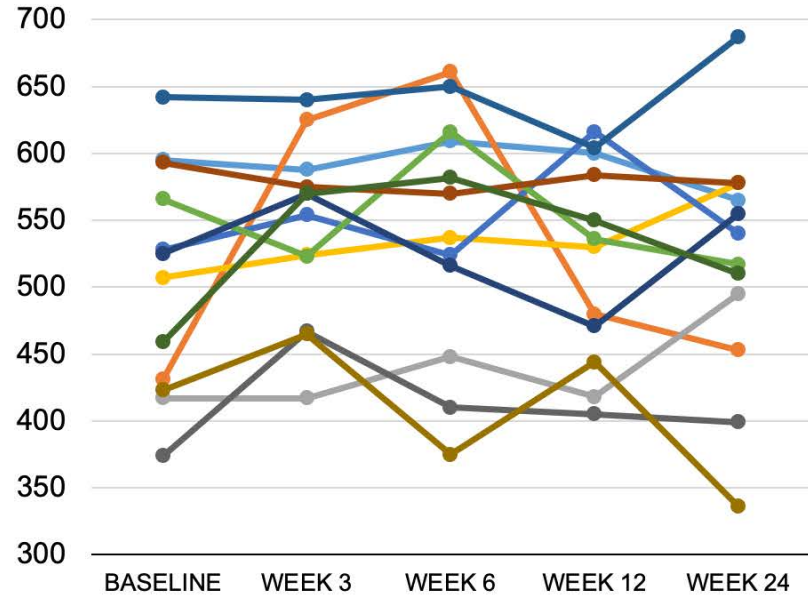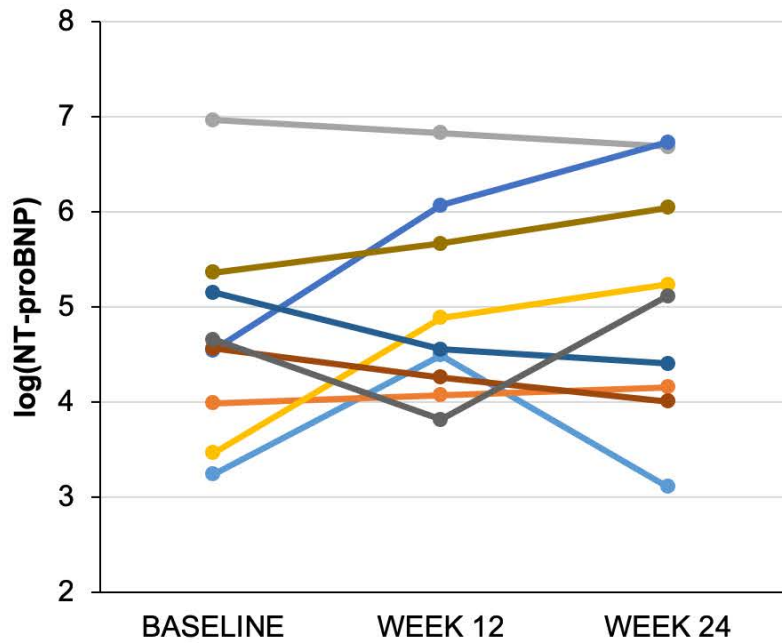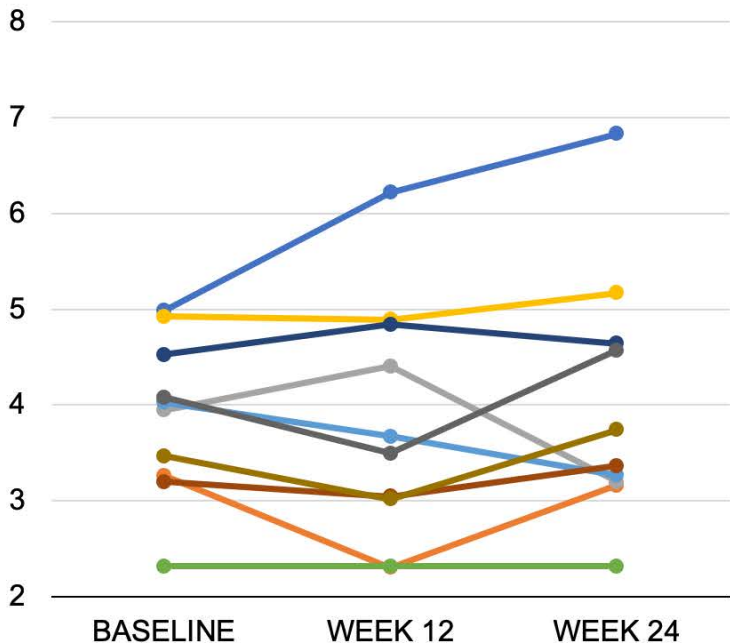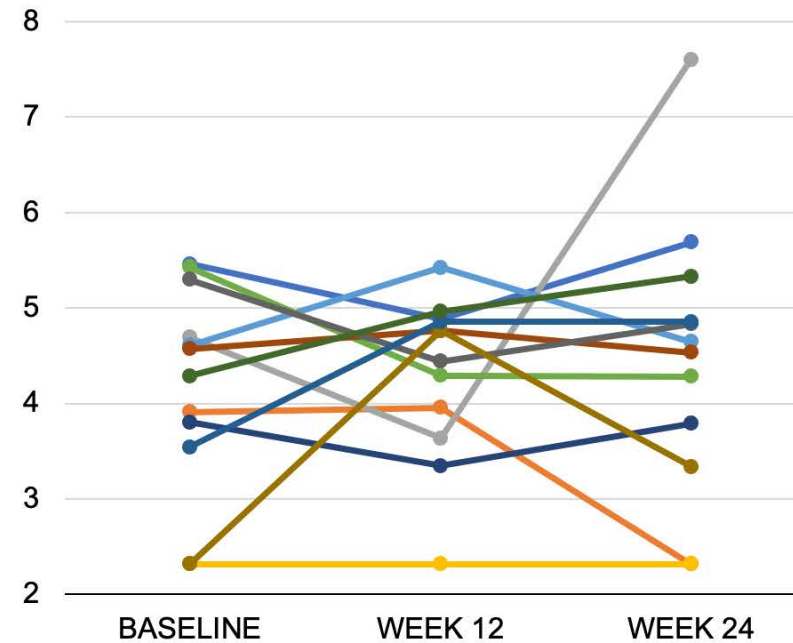

Supplement: Supplemental_Material1.pdf [file Supplemental_Material1.pdf]

### Cohort 1

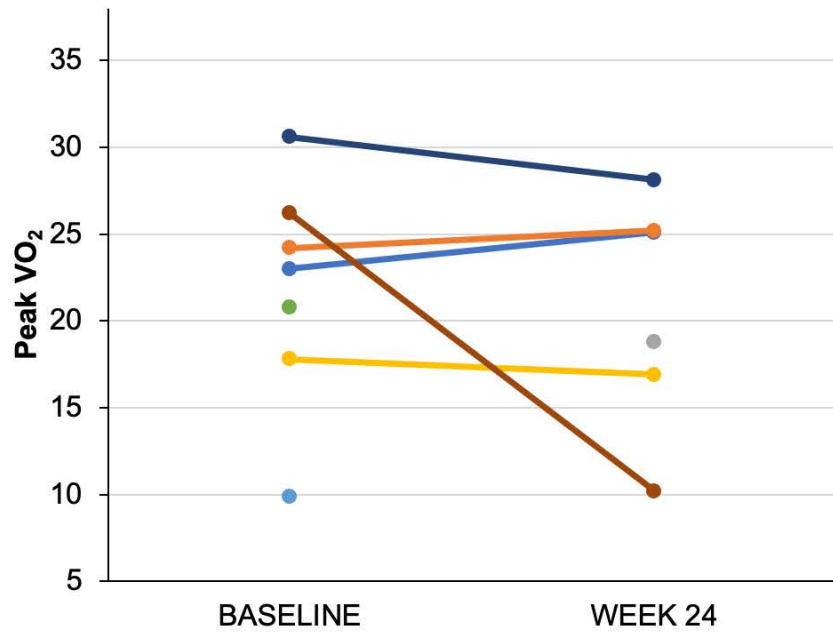

### Cohort 2

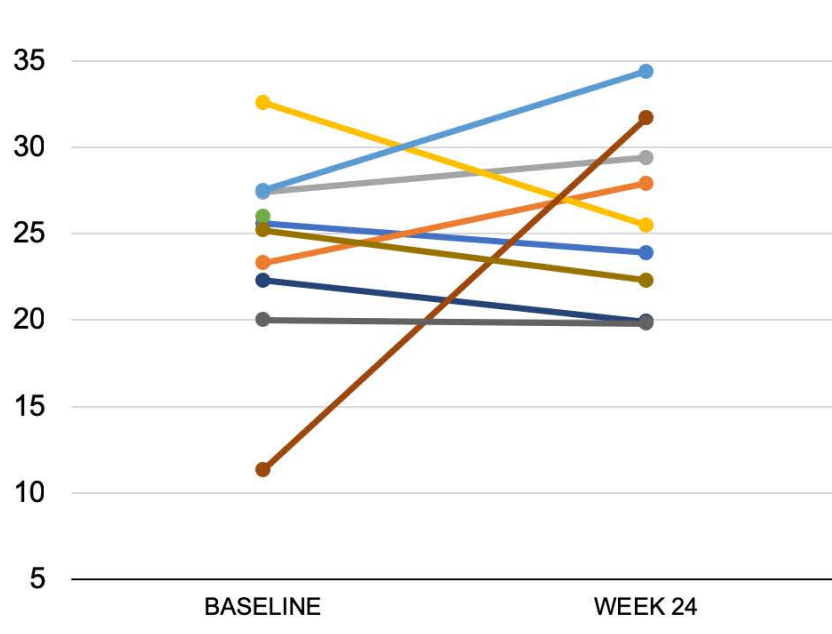

### Cohort 3

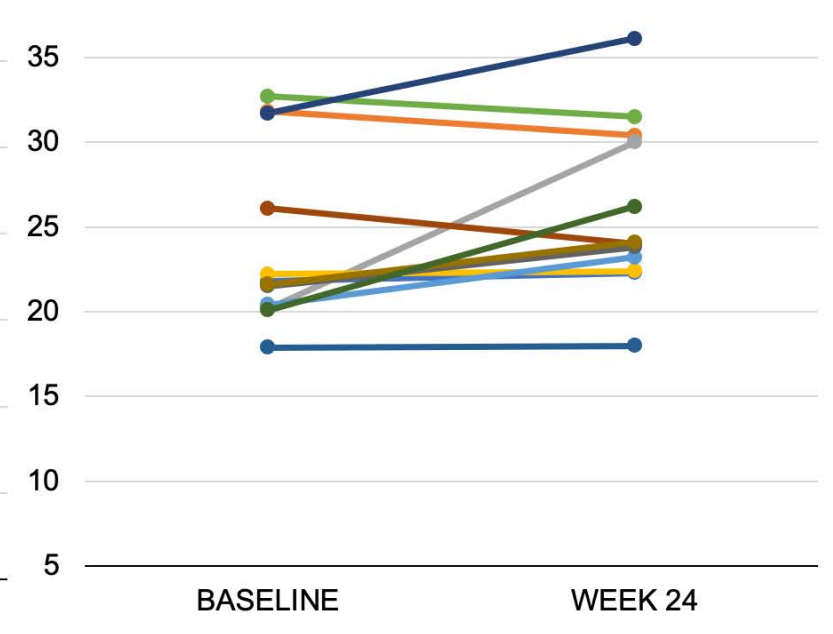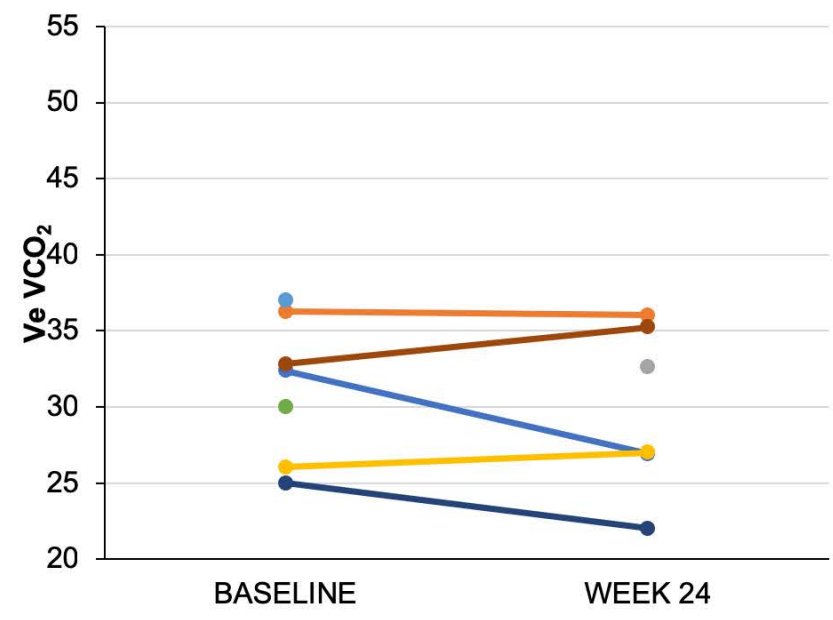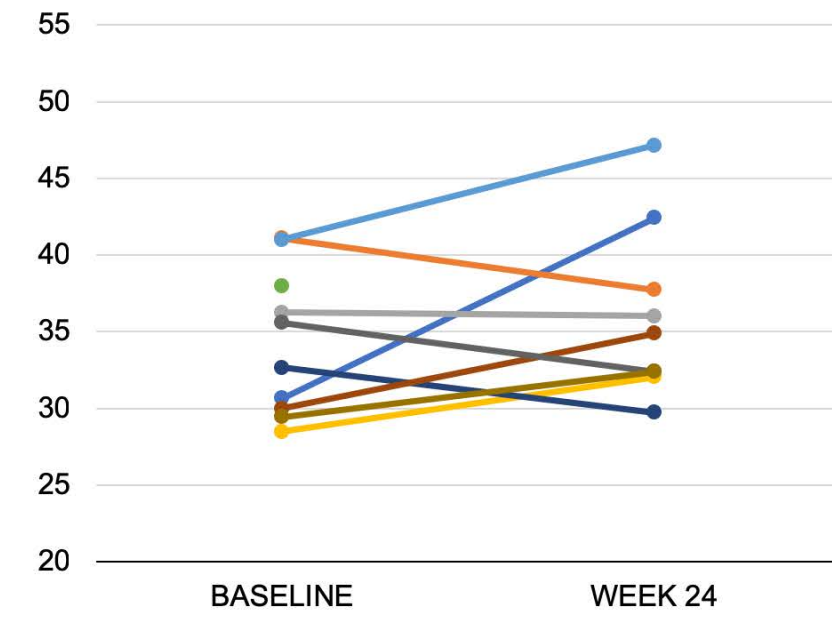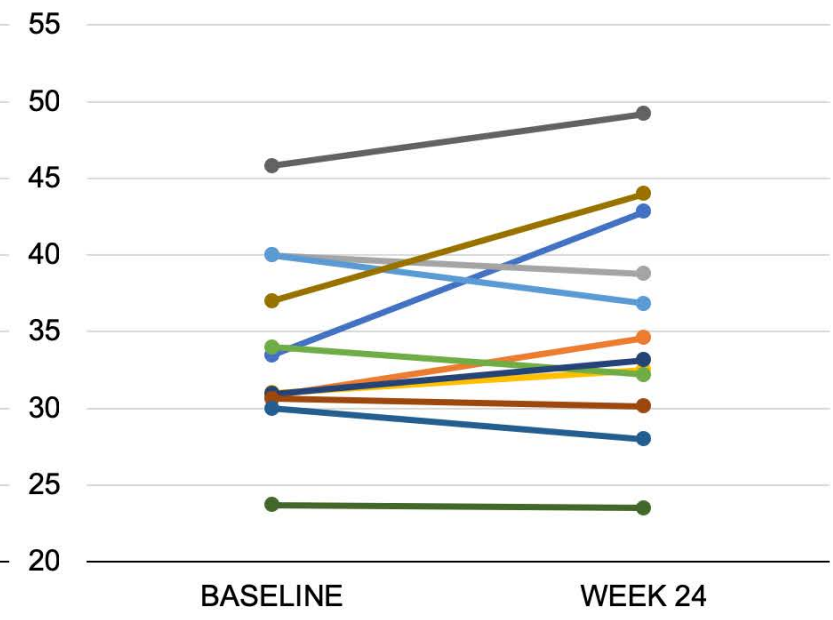

Supplement: Supplemental_Material2.pdf [file Supplemental_Material2.pdf]

### Cohort 1

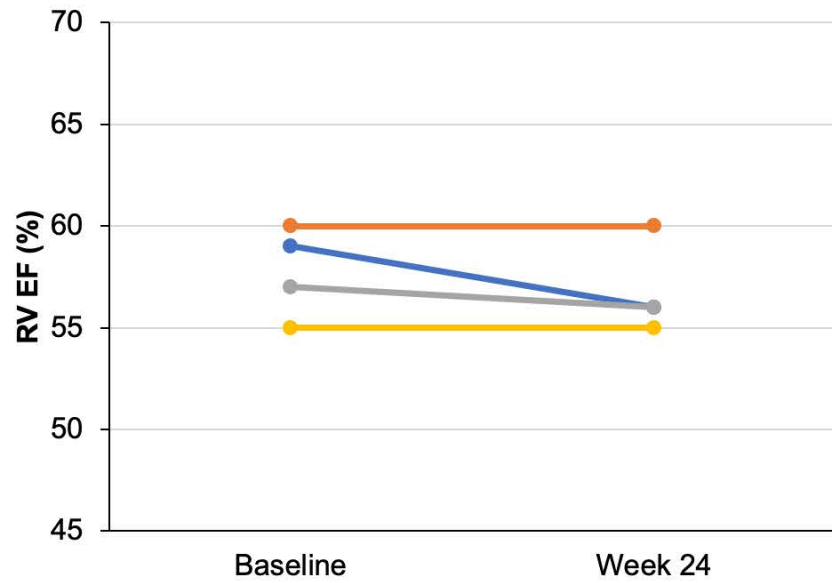

### Cohort 2

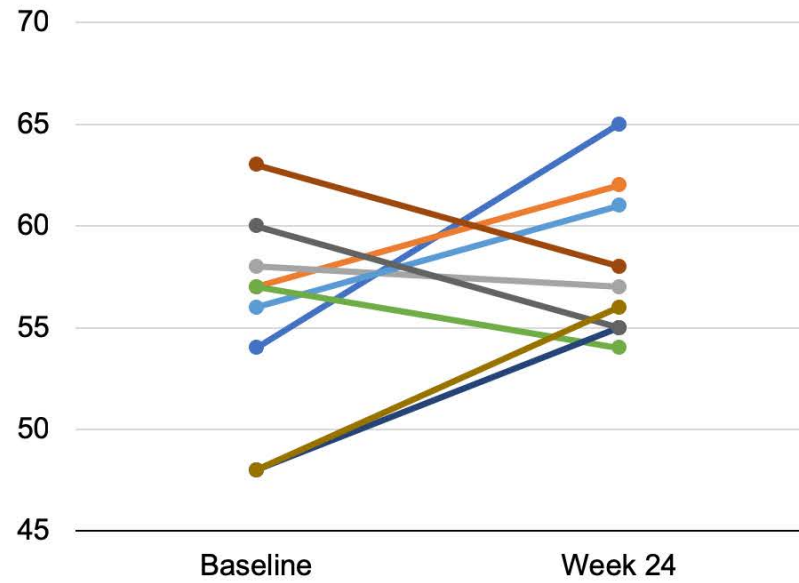

### Cohort 3

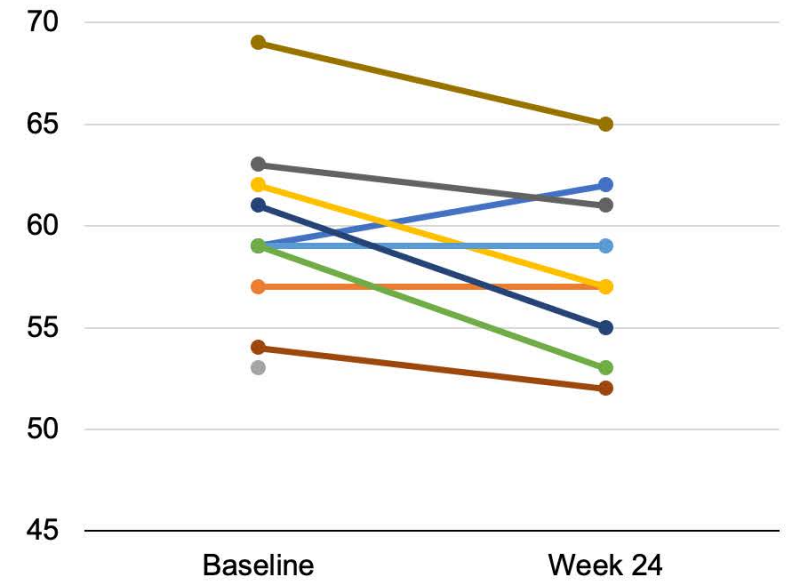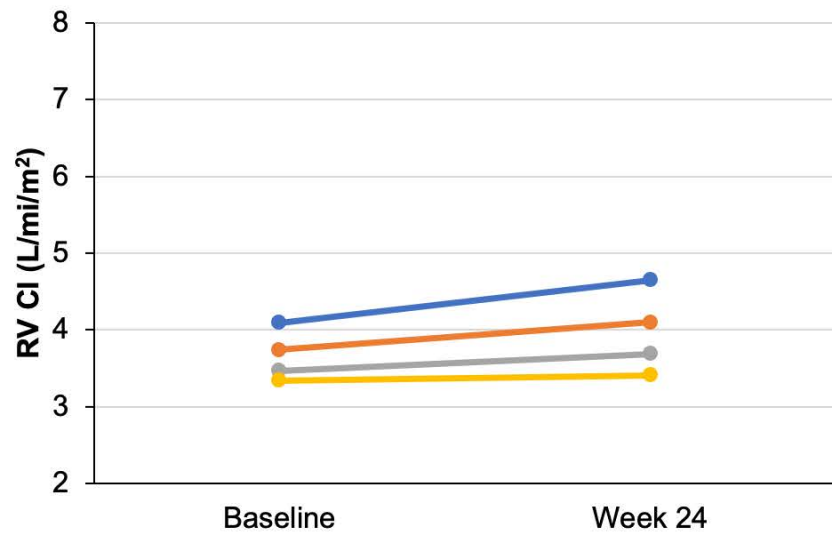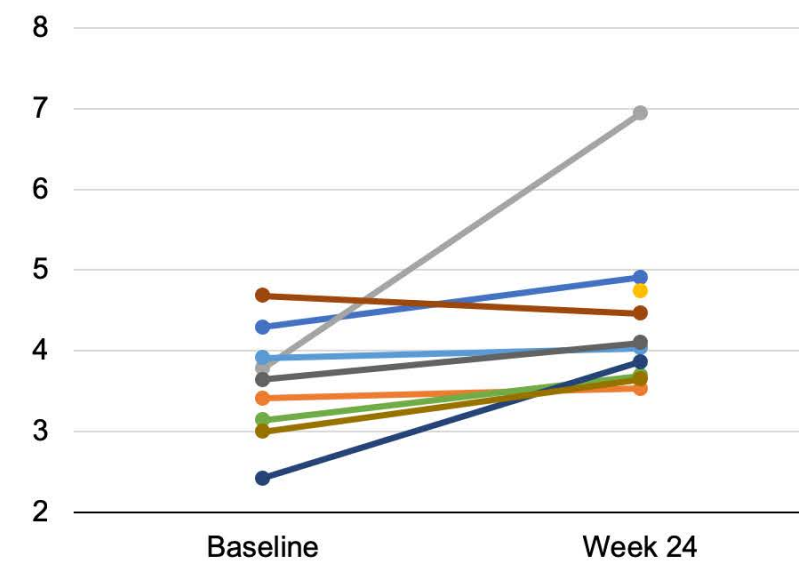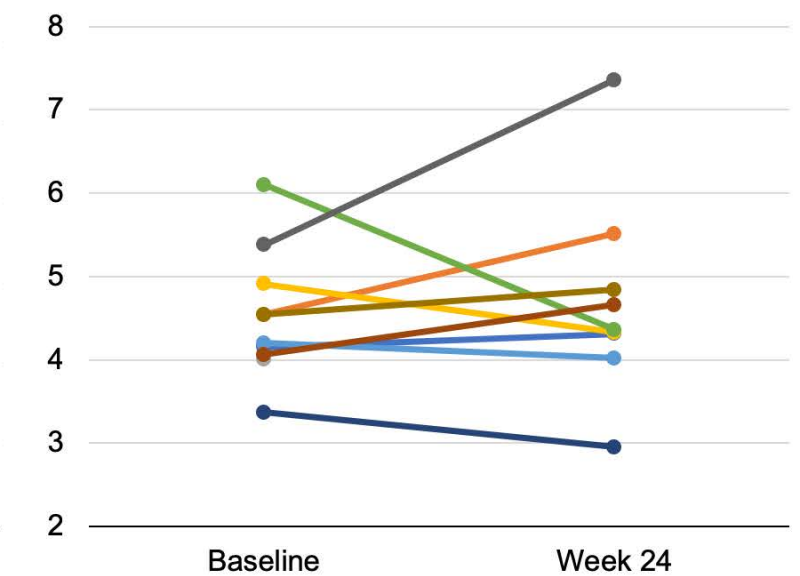

Supplement: Supplemental_Material3.pdf [file Supplemental_Material3.pdf]
